# Supplementary material for: Agronomic nitrogen‐use efficiency of rice can be increased by driving OsNRT2.1 expression with the OsNAR2.1 promoter
Source: PubMed Central journal article supplement (PMC5066696; doi:10.1111/pbi.12531), 2016-01-30

**Table S1.** Primers used to amplify the *OsNRT2.1* open reading frame.

| Primer name     | Forward primer (5'to3')         | Reverse primer (5'to3')        |
|-----------------|---------------------------------|--------------------------------|
| <i>OsNRT2.1</i> | CCAAGGTACCATGGACTCGTCGACGGTGGGC | GGCCACTAGTTTAGGCCGTGCTCCGGCGAG |

**Table S2.** Primers used to amplify the *OsNAR2.1* and *Ubiquitin* promoters.

| Primer name               | Forward primer (5'to3')         | Reverse primer (5'to3')       |
|---------------------------|---------------------------------|-------------------------------|
| <i>OsNAR2.1</i> Promoter  | GAGGCGCGCCTGCTGACAAACCAAACCGACT | CATTAATTAACCCACCTCTCCCACCTCAC |
| <i>Ubiquitin</i> Promoter | GGCGCGCCGTCGACCTGCAGGTCGAC      | TTAATTAAGTGCAGTGCAGCGTGACCC   |

**Table S3.** Primers used to detect *OsActin*, *OsNAR2.1*, and *OsNRT2.1* gene expression.

| Gene name       | Accession No. | Forward primer (5'to3') | Reverse primer (5'to3') |
|-----------------|---------------|-------------------------|-------------------------|
| <i>OsActin</i>  | AB047313      | GGAACTGGTATGGTCAAGGC    | AGTCTCATGGATAACCGCAG    |
| <i>OsNAR2.1</i> | AP004023      | GTCGTCGAGAAGCGCAAGA     | GTCCACTGAAGCTGCGAACTT   |
| <i>OsNRT2.1</i> | AB008519      | AGCACCATGTTCAACAGCAAGA  | CGAAGTAGGCCAGCCTCCAC    |

**Table S4.** Methods of NUE calculations

| Components:                                                   | Expressed as: | Definition:                             |
|---------------------------------------------------------------|---------------|-----------------------------------------|
| Agronomic nitrogen use efficiency                             | ANUE          | $G_w / N_s$                             |
| Nitrogen recovery efficiency                                  | NRE           | $RTNA / N_s \times 100\%$               |
| Physiological nitrogen use efficiency                         | PNUE          | $G_w / TNAM$                            |
| Nitrogen harvest index                                        | NHI           | $GNAM / TNAM \times 100\%$              |
| Dry matter translocation                                      | DMT           | $DMA - (DMM - \text{Grain Yield})$      |
| Dry matter translocation efficiency                           | DMTE          | $DMT / DMA \times 100\%$                |
| Contribution of pre-anthesis assimilates to grain yield       | CPAY          | $DMT / \text{Grain Yield} \times 100\%$ |
| Harvest index                                                 | HI            | $\text{Grain Yield} / DMM \times 100\%$ |
| Post-anthesis N uptake                                        | PANU          | $TNAM - TNAA$                           |
| Nitrogen translocation                                        | NT            | $TNAA - (TNAM - GNAM)$                  |
| Nitrogen translocation efficiency                             | NTE           | $NT / TNAA \times 100\%$                |
| Contribution of pre-anthesis N to grain nitrogen accumulation | CPNGN         | $NT / GNAM \times 100\%$                |

Note:  $G_w$  = grain yield – grain yield of zero-N plot;  $RTNA$  =  $TNAM$  of N-treated plot –  $TNAM$  of zero-N plot;  $N_s$  = N supply;  $TNAM$  = total N accumulation at maturity;  $GNAM$  = grain N accumulation at maturity.

**Table S5.** Real-time quantitative RT-PCR analysis of endogenous *OsNRT2.1* and *OsNAR2.1* expression in various transgenic lines and wild-type (WT) plants.

| <i>OsNRT2.1</i> |      | <i>pUBi:OsNRT2.1</i> |       |       |        | <i>pOsNAR2.1:OsNRT2.1</i> |      |      |        |
|-----------------|------|----------------------|-------|-------|--------|---------------------------|------|------|--------|
| Organs in plant | WT   | OE1                  | OE2   | OE3   | I-fold | O6                        | O7   | O8   | I-fold |
| Seed            | 1.0  | 4.4                  | 4.9   | 6.4   | 4.2    | 1.1                       | 1.0  | 1.0  | 0      |
| PL              | 1.2  | 5.6                  | 7.7   | 10.3  | 5.5    | 1.4                       | 1.4  | 1.3  | 0.1    |
| Leaf blade I    | 2.2  | 22.8                 | 18.2  | 26.5  | 9.0    | 2.7                       | 2.9  | 2.5  | 0.2    |
| Leaf blade II   | 2.9  | 29.2                 | 30.6  | 32.7  | 9.4    | 2.7                       | 2.7  | 3.3  | 0      |
| Leaf blade III  | 3.2  | 27.9                 | 31.9  | 40.8  | 9.5    | 3.4                       | 3.5  | 3.5  | 0.1    |
| Leaf sheath I   | 7.2  | 42.8                 | 49.3  | 63.5  | 6.2    | 17.1                      | 17.5 | 17.8 | 1.4    |
| Leaf sheath II  | 6.8  | 45.7                 | 49.9  | 63.1  | 6.7    | 15.6                      | 15.7 | 15.1 | 1.3    |
| Leaf sheath III | 6.0  | 43.9                 | 47.3  | 61.0  | 7.5    | 12.2                      | 12.8 | 11.4 | 1      |
| Inter node I    | 3.1  | 23.2                 | 28    | 32.2  | 8      | 6.7                       | 6.6  | 6.4  | 1.1    |
| Inter node II   | 3.3  | 29.2                 | 33.8  | 36.7  | 9.2    | 8.4                       | 9.0  | 8.7  | 1.7    |
| Inter node III  | 3.7  | 35.9                 | 45.2  | 46.2  | 10.6   | 8.8                       | 10.8 | 11.0 | 1.8    |
| Root            | 21.1 | 98.7                 | 110.7 | 151.2 | 4.7    | 52.5                      | 55.8 | 58.7 | 1.6    |
| <i>OsNAR2.1</i> |      | <i>pUBi:OsNRT2.1</i> |       |       |        | <i>pOsNAR2.1:OsNRT2.1</i> |      |      |        |
| Organs in plant | WT   | OE1                  | OE2   | OE3   | I-fold | O6                        | O7   | O8   | I-fold |
| Seed            | 0.3  | 0.6                  | 0.7   | 0.8   | 1.8    | 0.3                       | 0.2  | 0.2  | 0      |
| PL              | 0.3  | 0.9                  | 1.2   | 1.4   | 2.6    | 0.4                       | 0.4  | 0.3  | 0.1    |
| Leaf blade I    | 0.3  | 1.8                  | 1.6   | 1.8   | 5.3    | 0.3                       | 0.3  | 0.3  | 0.1    |
| Leaf blade II   | 0.3  | 1.6                  | 2     | 2.1   | 4.6    | 0.3                       | 0.4  | 0.5  | 0.2    |
| Leaf blade III  | 0.3  | 1.3                  | 1.5   | 2.2   | 4.6    | 0.3                       | 0.4  | 0.3  | 0.1    |
| Leaf sheath I   | 2.1  | 9.3                  | 9.5   | 10.5  | 3.6    | 6.7                       | 6.7  | 6.8  | 2.2    |
| Leaf sheath II  | 2.0  | 9.6                  | 9.8   | 10.1  | 3.9    | 7.0                       | 7.0  | 6.7  | 2.4    |
| Leaf sheath III | 1.8  | 7.4                  | 7.8   | 8.7   | 3.3    | 5.5                       | 5.5  | 5.3  | 1.9    |
| Inter node I    | 0.7  | 4.3                  | 4.66  | 5.3   | 5.8    | 2.4                       | 2.4  | 2.4  | 2.4    |
| Inter node II   | 0.7  | 4.4                  | 4.3   | 5.4   | 5.4    | 2.9                       | 2.9  | 2.9  | 2.9    |
| Inter node III  | 0.8  | 5.3                  | 6.2   | 6.7   | 6.2    | 3.0                       | 3.0  | 3.2  | 2.7    |
| Root            | 4.9  | 15.5                 | 17.2  | 23.1  | 2.8    | 12.7                      | 13.1 | 14.2 | 1.7    |

Note: I-fold: The average increase fold compared with WT. PL means palea and lemma. RNA was extracted from 14 days after pollination. We defined the *OsNRT21* expression of WT was set equal to 1

**Figure S1.** Diagram of *pUbi:OsNRT2.1* and *pOsNAR2.1:OsNRT2.1* constructs.

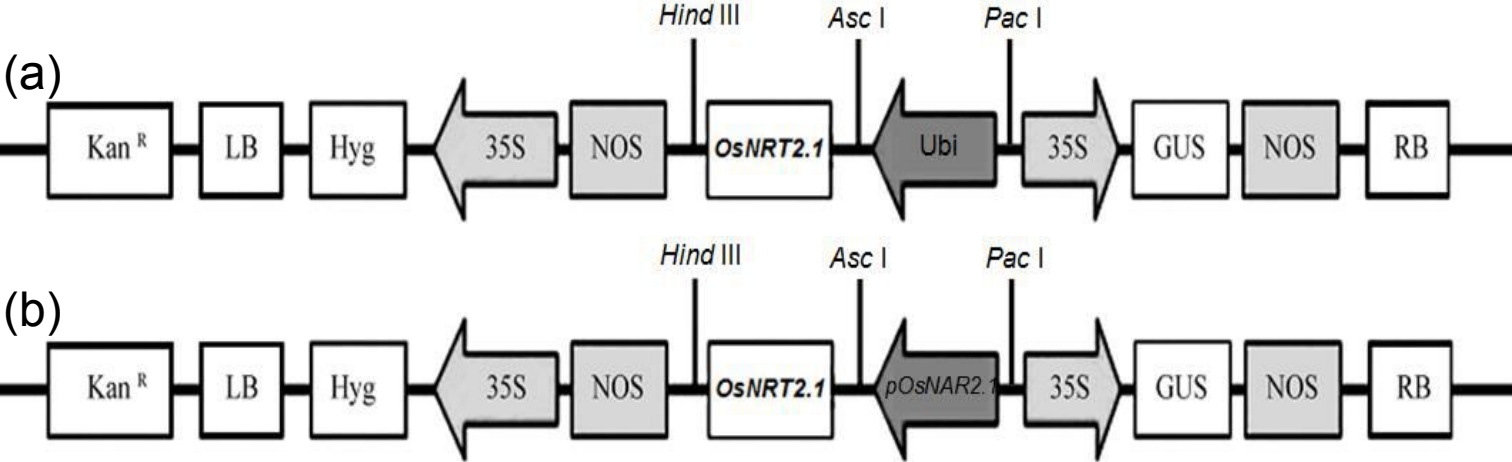

**Figure S2.** Characterization of T0 generation transgenic lines.

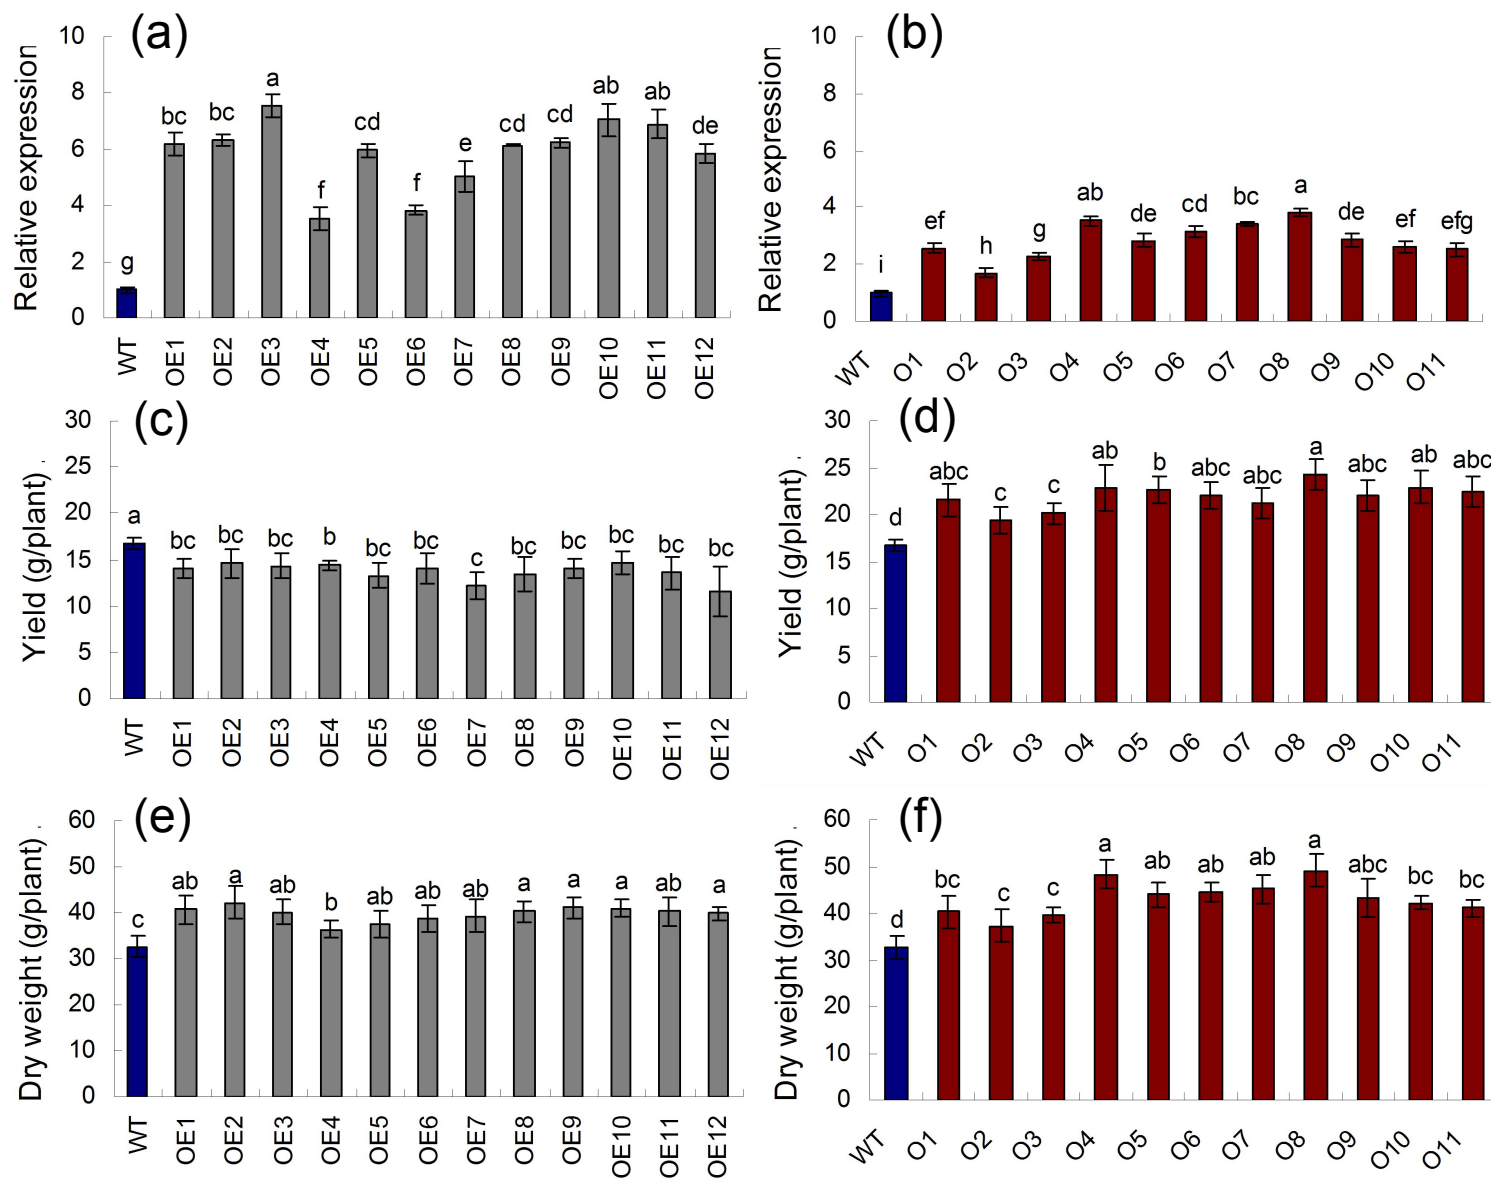

**Figure S3.** Grain yield and dry weight of WT and T1 generation transgenic plants.

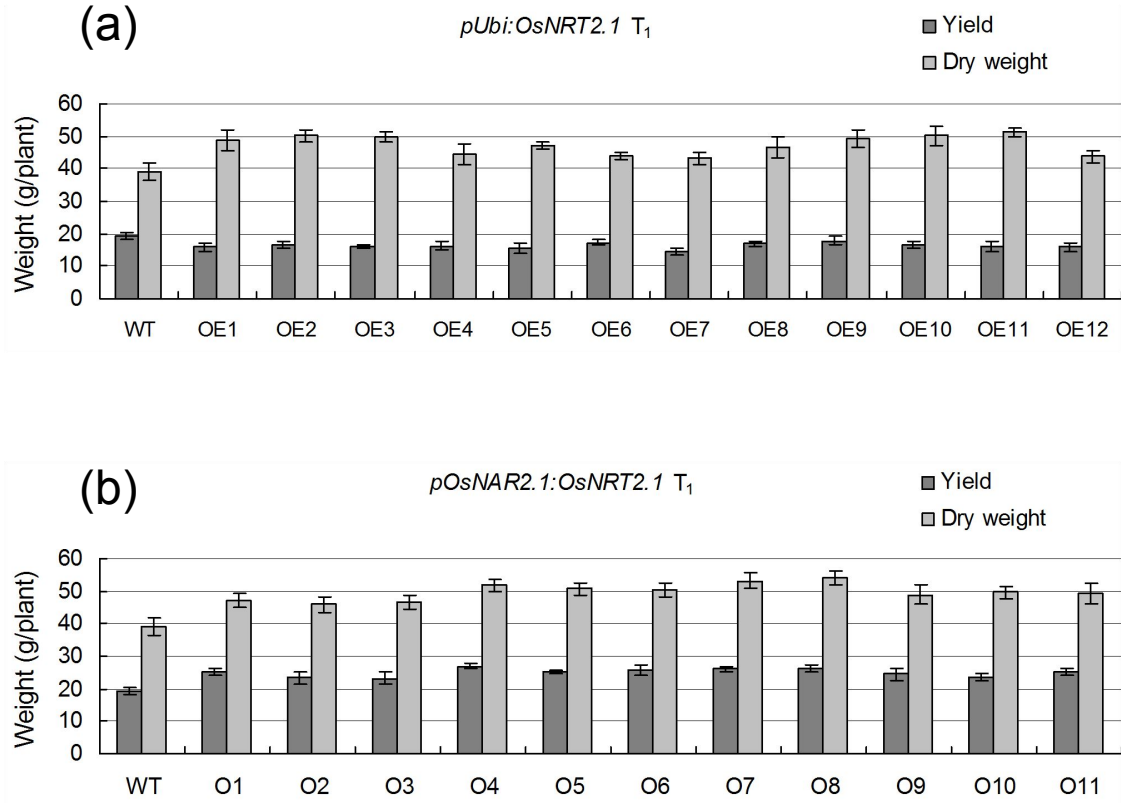



**Figure S4.** Southern blot analysis of transgene copy number.

M P O4-2 O5-5 O6-4 O7-6 O8-3 O9-9 OE1-2 OE2-5 OE3-4 OE4-2 OE5-1

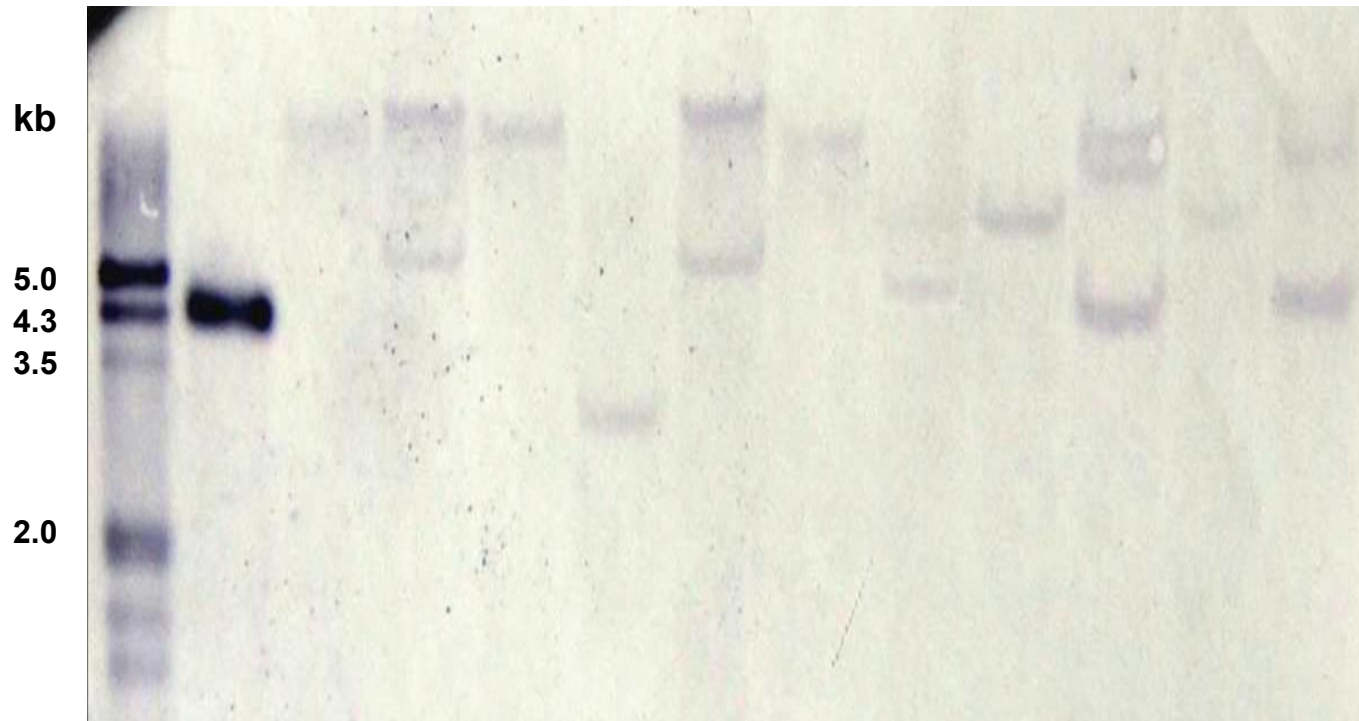

**Figure S5.** Grain yield, dry weight and ANUE of WT and T4 generation transgenic plants under low and normal N supplies .

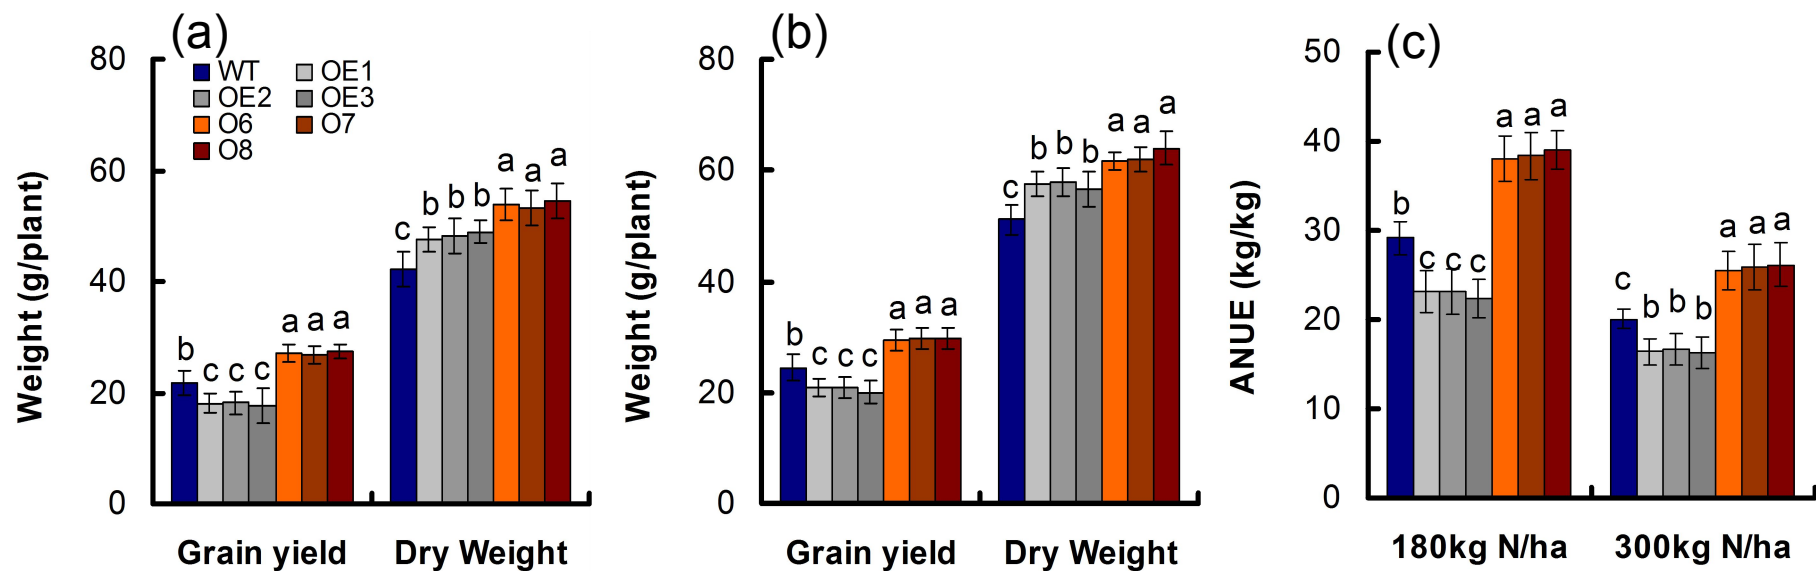

**Figure S6.** The diagramma of RNA sampling in T4 generation transgenic lines and WT plants.

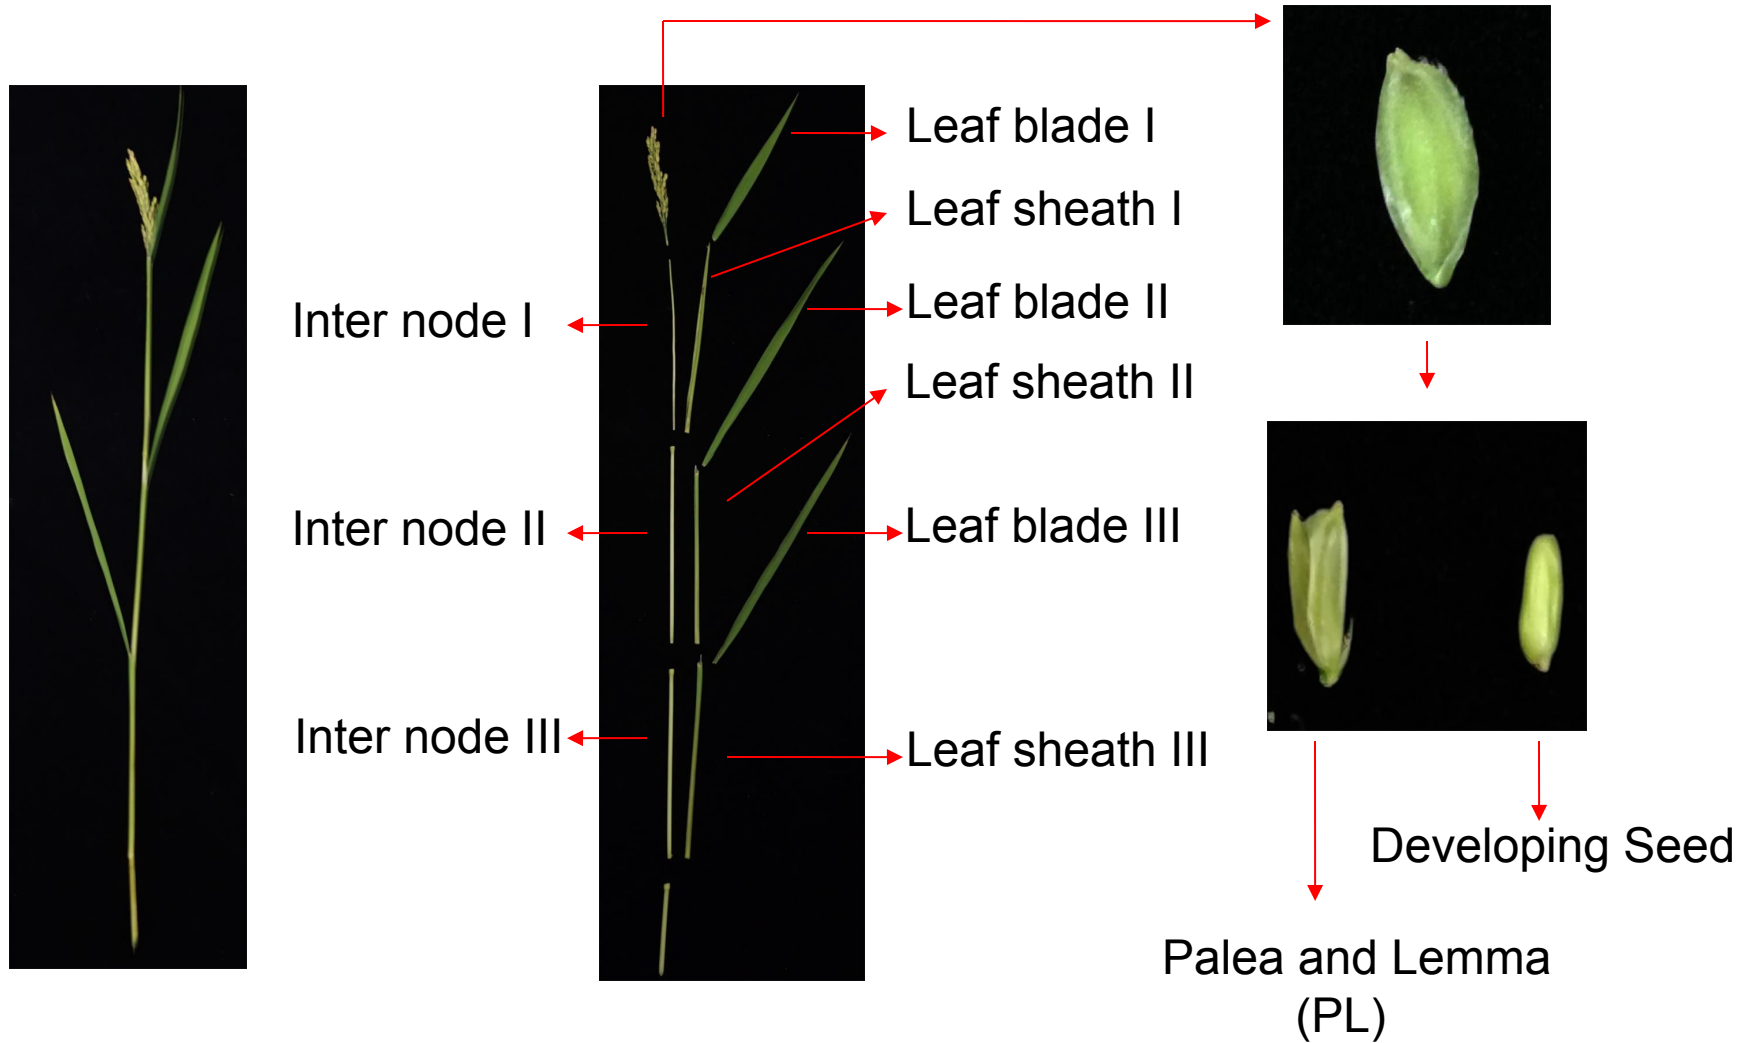

**Figure S7.** Ratios of *OsNRT2.1* to *OsNAR2.1* expression in different organs of WT and transgenic lines.

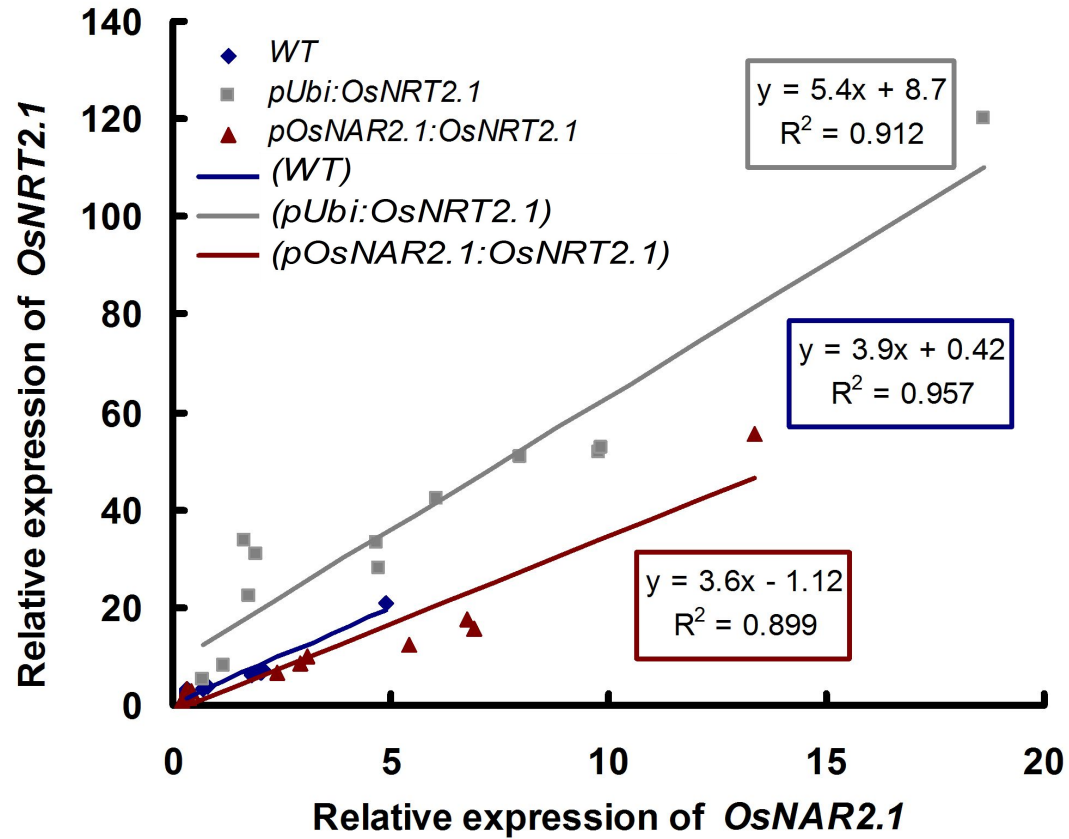

**Figure S8.** The diagramma of RNA sampling in T3 generation transgenic lines and WT plants.

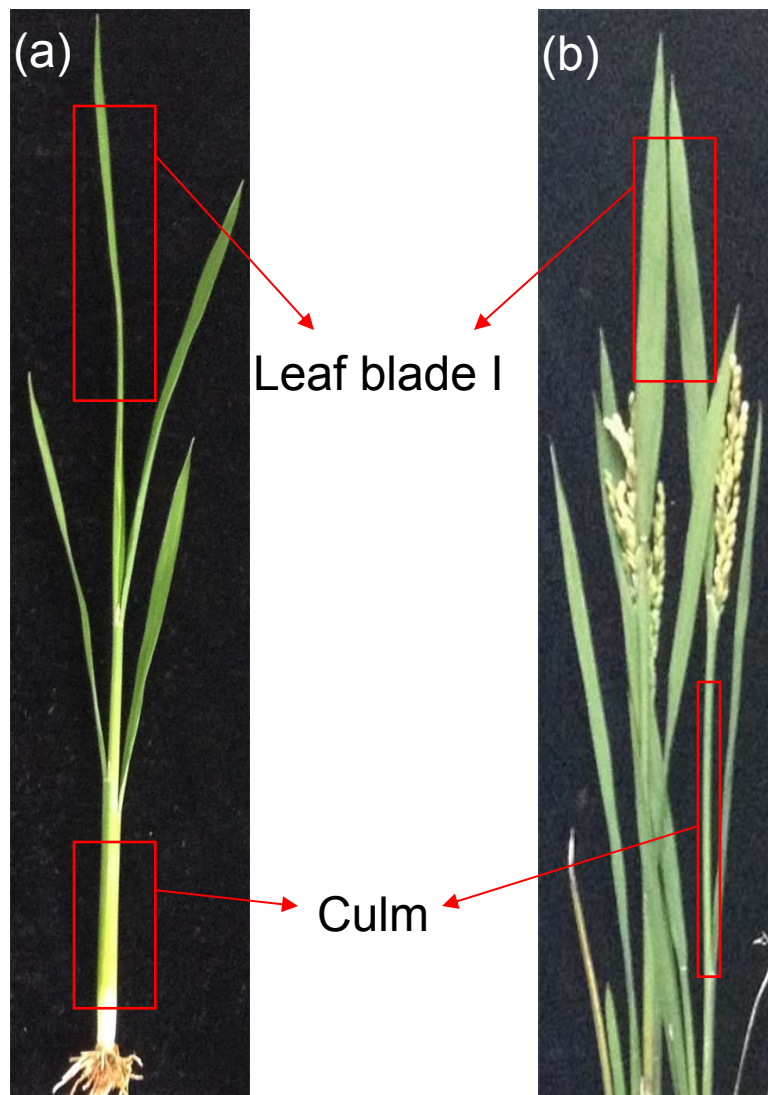

**Figure S9.** Changes in genes expression in leaf blade I throughout the experimental growth period.

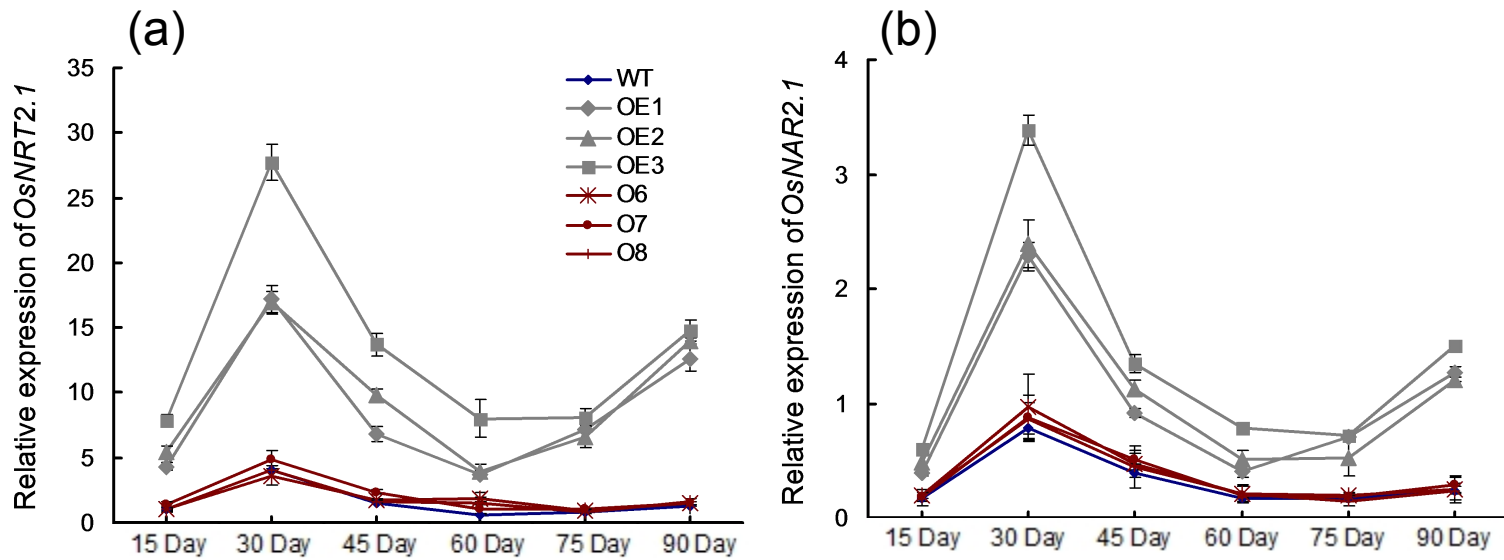

**Figure S10.** Ratios of *OsNRT2.1* and *OsNAR2.1* expression in the leaf blade I of WT and transgenic plants during different periods.

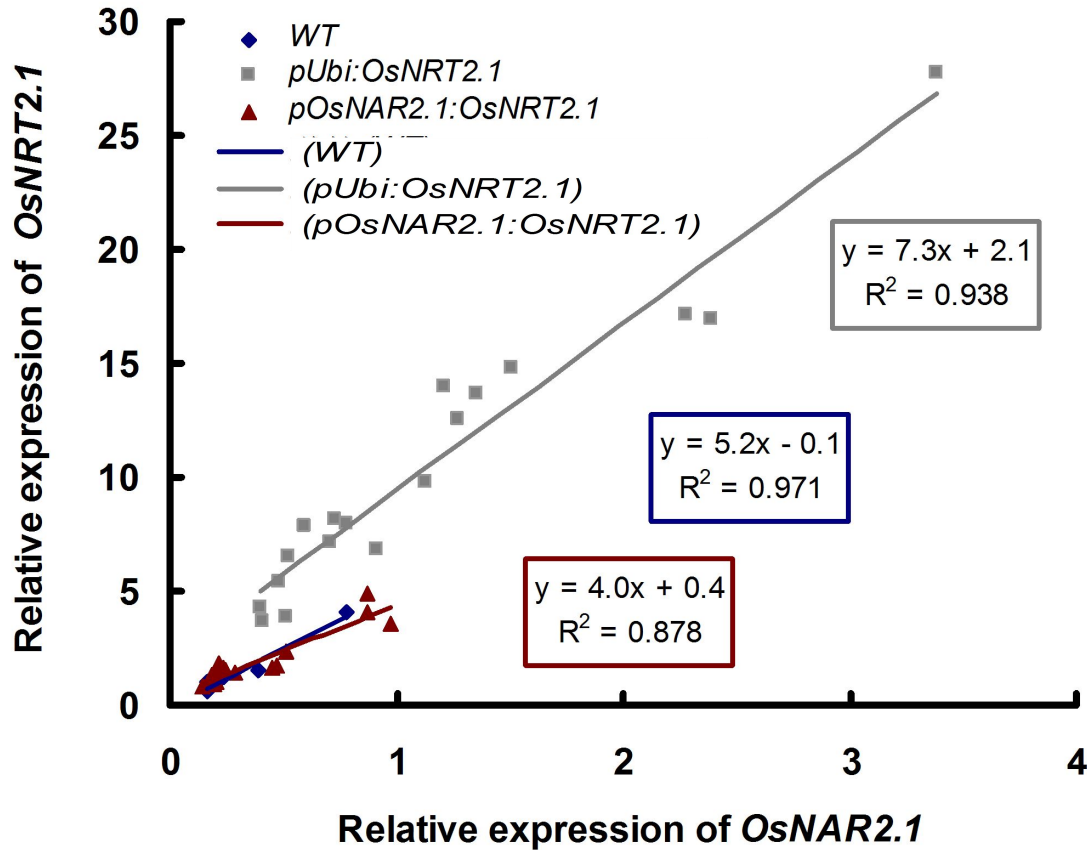

**Figure S11.** A field experiment picture of WT and T3 generation transgenic plants.

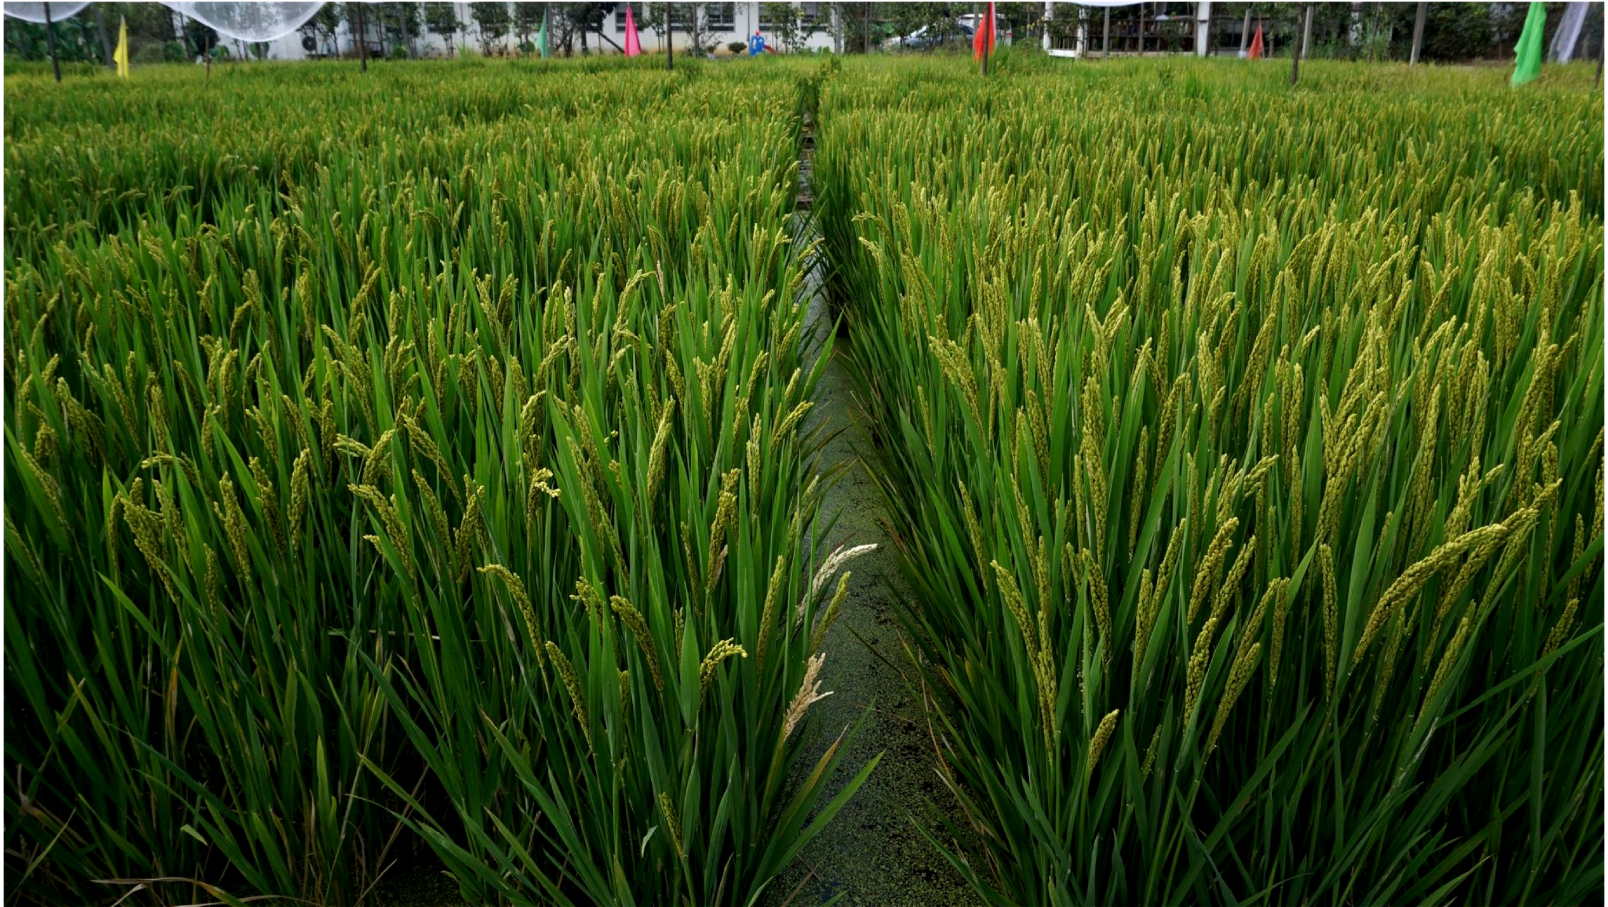

Supplement: PBI-14-1705-s001.pdf [file PBI-14-1705-s001.pdf]
